# Supplementary material
Source: publisher figshare collection journal article supplement (https://gsapubs.figshare.com/articles/dataset/_/19879837)
Supplement: Supplementary file 1 [file 35295760]

# Eruptive tempo of Emeishan large igneous province: relations to biotic crises and paleoclimate change around the Guadalupian-Lopingian boundary

Hu Huang<sup>1\*</sup>, Magdalena H. Huyskens<sup>2</sup>, Qing-Zhu Yin<sup>2</sup>, Peter A. Cawood<sup>3</sup>, Mingcai Hou<sup>1</sup>, Jianghai Yang<sup>4</sup>, Fuhao Xiong<sup>1</sup>, Yuansheng Du<sup>4</sup> and Chenchen Yang<sup>1</sup>

<sup>1</sup>State Key Laboratory of Oil and Gas Reservoir Geology and Exploitation, Institute of Sedimentary Geology, Chengdu University of Technology, Chengdu 610059, China

<sup>2</sup>Department of Earth and Planetary Sciences, University of California at Davis, Davis, California 95616-8605, USA

<sup>3</sup>School of Earth, Atmosphere & Environment, Monash University, Melbourne, VIC 3800, Australia

<sup>4</sup>State Key Laboratory of Biogeology and Environmental Geology, China University of Geosciences, Wuhan 430074, China

## 1. Field photographs and photomicrographs

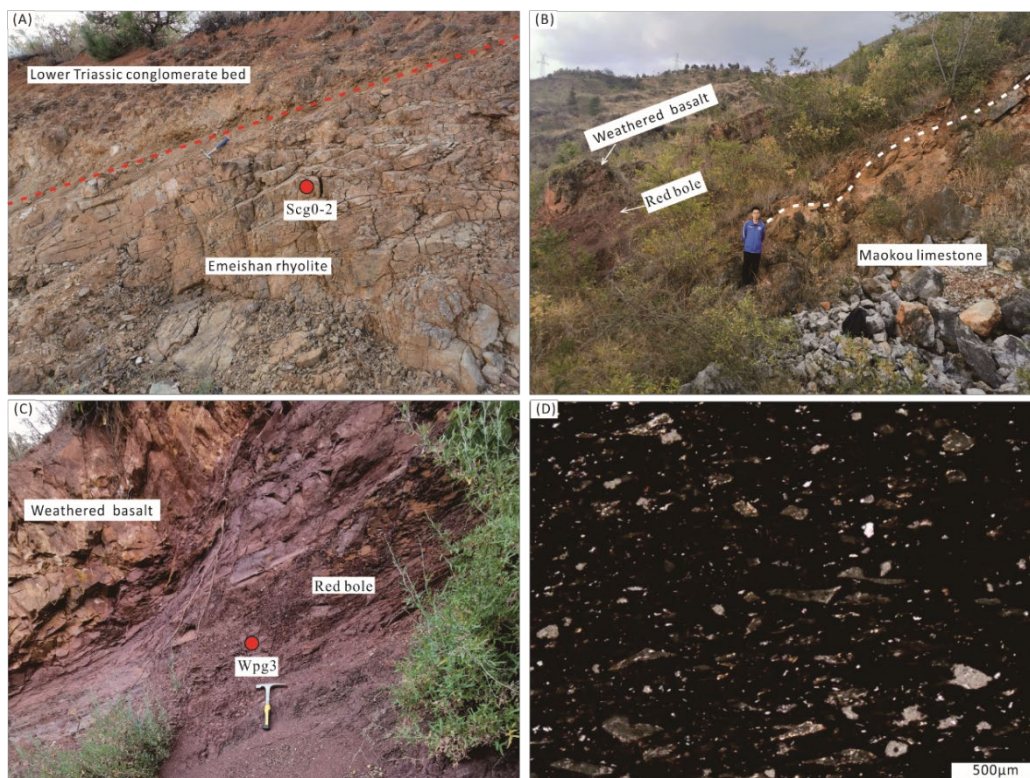

**Figure DR1.** Representative field photographs and photomicrograph of the volcano-sedimentary succession at Binchuan. (A) The contact between the Emeishan rhyolites

(sample Scg0-2) and overlying Lower Triassic conglomerates at Shangcang. (B) The contact between the Maokou Formation and overlying red boles at the lowermost volcanic succession at Wase. (C) Red boles (sample Wpg3) at the lowermost volcanic succession at Wase. (D) Photomicrograph of sample Wpg3 under the plane-polarized light.

## 2. Analytical methods and results

Thousands and hundreds of zircons were obtained from the rhyolite and red bole samples, respectively. Zircons were extracted from the samples by standard separation methods and were annealed at 900 °C for 48 h. For sample Wpg3 zircon grains were put on a glass slide with double sided sticky tape for U-Pb laser ablation inductively coupled plasma mass spectrometry (LA-ICP-MS). The LA-ICP-MS U-Pb isotopic data for sample Wpg3 are presented in Table DR1. The concordia diagram and ranked  $^{206}\text{Pb}/^{238}\text{U}$  age plots of zircons analyzed are illustrated in Figure DR2. No LA analyses were performed for samples Scg2-3 and Scg0-2, which had no inherited zircons based on the previous LA-ICP-MS dating (Huang et al., 2022). We selected zircons from the youngest group identified in LA for Wpg3 and randomly for the other samples. Prior to chemical abrasion in concentrated HF and HNO<sub>3</sub> for 15 h at 190 °C the surface of the zircons was cleaned in acetone and 3M HNO<sub>3</sub>. After the chemical abrasion step, the single zircons were rinsed with MilliQ water, treated with 6M HCl on a hotplate and subsequently rinsed with alternating MilliQ water and HNO<sub>3</sub>. This step is followed by dissolution in concentrated HF in a Parr dissolution vessel for 48 h at 220 °C in the presence of a  $^{202}\text{Pb}$ - $^{205}\text{Pb}$ - $^{233}\text{U}$ - $^{236}\text{U}$  tracer (Huyskens et al., 2016). After dissolution, the solution was dried down, redissolved in HCl prior to standard HCl ion exchange chemistry (Krogh 1973). The Pb fraction was loaded onto zone refined Re filaments with a silicagel activator (Huyskens et al., 2012) and Pb isotopic composition was analyzed using a *Triton Plus* TIMS (thermal ionization mass spectrometer) at UC Davis. For the majority of zircons, the amount of Pb was small and the measurements were performed in peak jumping mode on a secondary electron multiplier. For the larger samples, Pb was also measured with  $^{204}\text{Pb}$  in the axial SEM,

while all other isotopes ( $^{202}\text{Pb}$ ,  $^{205}\text{Pb}$ ,  $^{206}\text{Pb}$ ,  $^{207}\text{Pb}$ , and  $^{208}\text{Pb}$ ) were collected simultaneously in Faraday cups coupled with  $10^{13} \Omega$  resistor amplifier boards. The SEM yield compared to the Faraday cups was determined by additional measurement of  $^{205}\text{Pb}$  in the axial SEM. Uranium-isotope dilution measurements were performed on a *Neptune Plus* MC (Multi-collector) -ICP-MS at UC Davis using an ESI APEX introduction system. Faraday cups measuring  $^{238}\text{U}$  and  $^{235}\text{U}$  were coupled with  $10^{12} \Omega$  resistors and the tracer isotopes  $^{233}\text{U}$  and  $^{236}\text{U}$  were coupled with  $10^{11} \Omega$  resistors. Samples were bracketed with the U-isotopic standard CRM 112a and measurements were corrected for instrumental mass dependent fractionation using an exponential law based on the known  $^{233}\text{U}/^{236}\text{U}$  ratio of IRMM-3636 (Verbruggen et al., 2008).

U–Pb ages and uncertainties were calculated using the algorithms of Schmitz and Schoene (2007). The Temora zircon standard was measured 4 times during this study. Three of those analyses are in good agreement with a weighted mean  $^{206}\text{Pb}/^{238}\text{U}$  age  $417.270 \pm 0.091$  Ma (MSWD = 0.15, 95% confidence), while the fourth grain is slightly older at  $417.69 \pm 0.17$  Ma. This variation in age for single Temora zircons grains has been observed before (Schaltegger et al., 2021). Complete Pb and U isotopic data by the CA-ID-IRMS method are given in Table DR2. The concordia and corresponding ranked  $^{206}\text{Pb}/^{238}\text{U}$  age plots were generated using IsoplotR (Vermeesch, 2018).

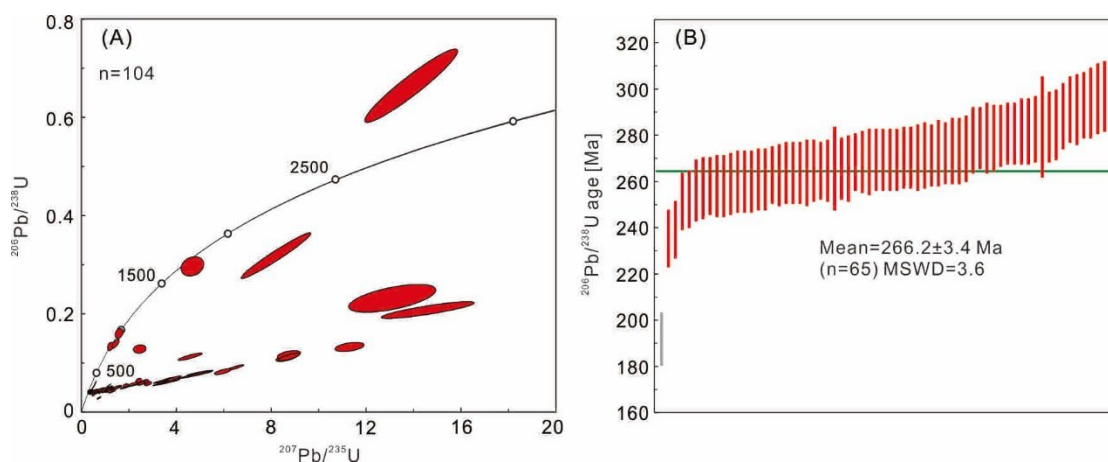

**Figure DR2.** Concordia diagram (A) and ranked  $^{206}\text{Pb}/^{238}\text{U}$  age plots (B) of zircons analyzed by LA-ICP-MS for sample Wpg3. All youngest analyzed zircons are

included in the ranked  $^{206}\text{Pb}/^{238}\text{U}$  age plots, regardless of concordance. A high number (> 90 %) of discordant grains is caused by both Pb loss and incorporation of common Pb on the surface of unpolished grains. These results were used as a guide to select the youngest grains for CA-ID-IRMS.

### Scg0-2

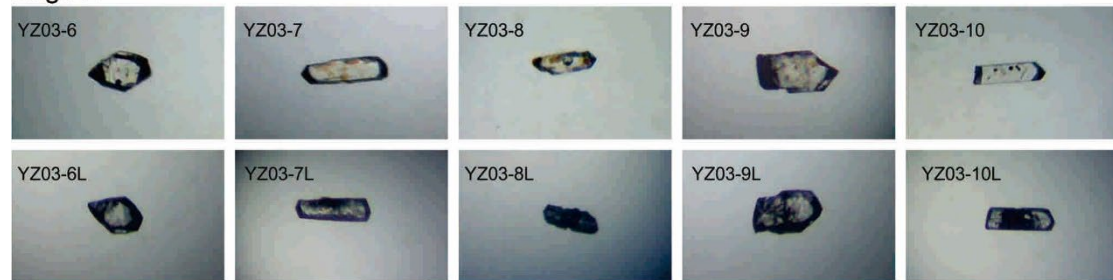

### Scg2-3

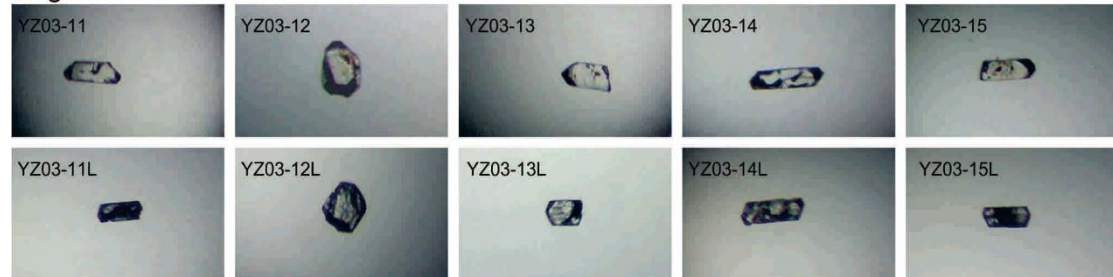

### Wpg3

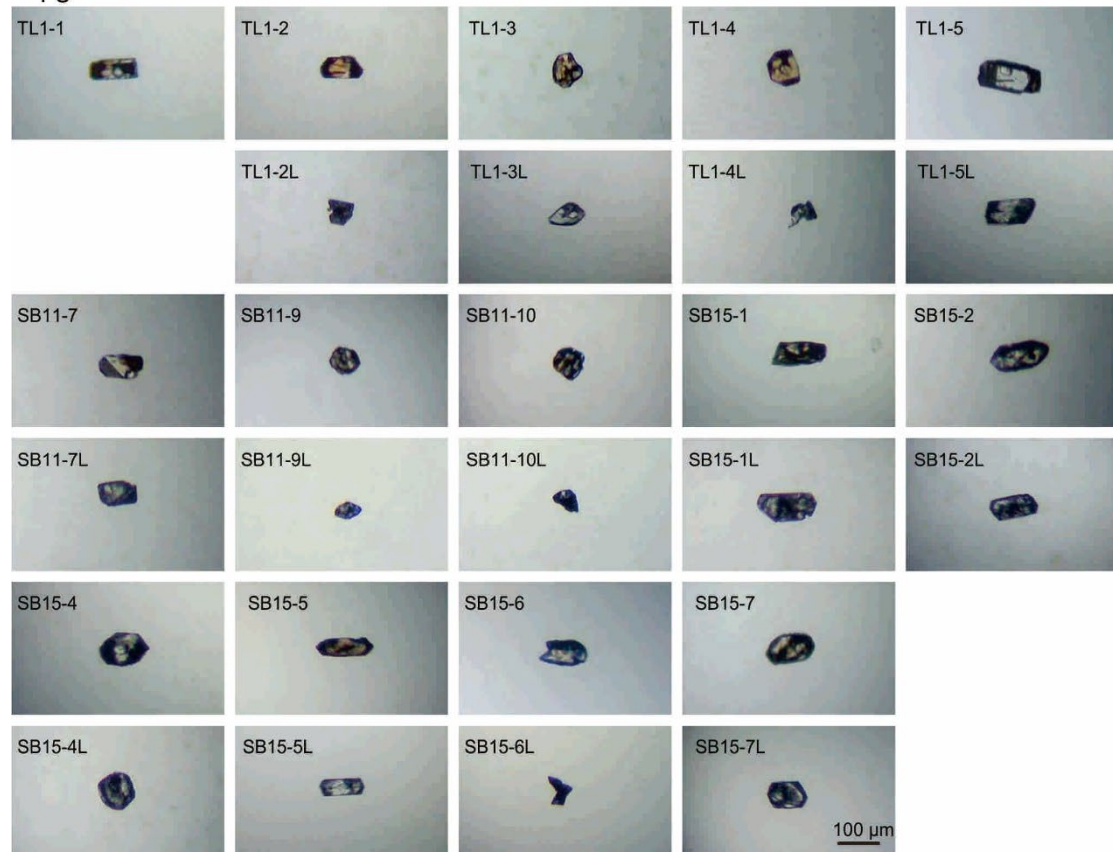

**Figure DR3.** Pictures show individual zircons used for CA-ID-IRMS before and after the chemical abrasion step. Images after chemical abrasion are denoted by the sample ID followed by the letter L. All images are at the same scale (see the last image for scale). Note that no image of TL1-1 was taken after chemical abrasion.

Table DR1: LA-ICP-MS U-Pb isotopic data of analyzed zircon grains from the sample Wpg3.

| Sample spot     | Analysis       | Compositional Parameters |     |     |      | Radiogenic Isotope Ratios            |        |                                     |       |                                     |        |      | Isotopic Ages                        |     |                                     |     |                                     |     |
|-----------------|----------------|--------------------------|-----|-----|------|--------------------------------------|--------|-------------------------------------|-------|-------------------------------------|--------|------|--------------------------------------|-----|-------------------------------------|-----|-------------------------------------|-----|
|                 | ID in          | U                        | Th  | Pb  | Th/U | <sup>207</sup> Pb/ <sup>206</sup> Pb |        | <sup>207</sup> Pb/ <sup>235</sup> U |       | <sup>206</sup> Pb/ <sup>238</sup> U |        | rho  | <sup>207</sup> Pb/ <sup>206</sup> Pb |     | <sup>207</sup> Pb/ <sup>235</sup> U |     | <sup>206</sup> Pb/ <sup>238</sup> U |     |
|                 | CA-ID-IRMS     | ppm                      | ppm | ppm |      | Ratio                                | ±2σ    | Ratio                               | ±2σ   | Ratio                               | ±2σ    |      | Age (Ma)                             | ±2σ | Age (Ma)                            | ±2σ | Age (Ma)                            | ±2σ |
| Wpg3-a1         |                | 549                      | 410 | 168 | 0.75 | 0.215                                | 0.01   | 1.53                                | 0.14  | 0.0511                              | 0.0029 | 0.75 | 2937                                 | 75  | 932                                 | 52  | 321                                 | 18  |
| Wpg3-a2         |                | 65                       | 49  | 40  | 0.75 | 0.1137                               | 0.0043 | 4.68                                | 0.39  | 0.297                               | 0.016  | 0.23 | 1862                                 | 72  | 1762                                | 68  | 1675                                | 80  |
| <b>Wpg3-a3</b>  | <b>TL1-1</b>   | 546                      | 388 | 58  | 0.71 | 0.0811                               | 0.0035 | 0.46                                | 0.039 | 0.0412                              | 0.0022 | 0.31 | 1204                                 | 85  | 382                                 | 26  | 261                                 | 14  |
| Wpg3-a4         |                | 478                      | 500 | 427 | 1.05 | 0.443                                | 0.017  | 4.99                                | 0.45  | 0.0795                              | 0.0047 | 0.91 | 4060                                 | 59  | 1782                                | 71  | 492                                 | 28  |
| Wpg3-a5         |                | 1006                     | 845 | 327 | 0.84 | 0.2248                               | 0.0081 | 1.39                                | 0.15  | 0.047                               | 0.0048 | 0.99 | 3019                                 | 60  | 835                                 | 38  | 281                                 | 23  |
| Wpg3-a6         |                | 294                      | 204 | 59  | 0.69 | 0.14                                 | 0.011  | 0.94                                | 0.11  | 0.0468                              | 0.0025 | 0.78 | 2070                                 | 150 | 651                                 | 56  | 295                                 | 16  |
| <b>Wpg3-a7</b>  | <b>SB11-10</b> | 418                      | 282 | 35  | 0.67 | 0.0583                               | 0.0025 | 0.331                               | 0.027 | 0.0419                              | 0.0022 | 0.38 | 493                                  | 88  | 288                                 | 20  | 265                                 | 13  |
| Wpg3-a8         |                | 1085                     | 988 | 142 | 0.91 | 0.0713                               | 0.0027 | 0.547                               | 0.071 | 0.0552                              | 0.0064 | 0.99 | 966                                  | 75  | 410                                 | 28  | 336                                 | 33  |
| Wpg3-a9         |                | 367                      | 716 | 353 | 1.95 | 0.1791                               | 0.0073 | 8.2                                 | 1.2   | 0.319                               | 0.038  | 0.97 | 2626                                 | 67  | 1980                                | 130 | 1660                                | 170 |
| Wpg3-a10        |                | 488                      | 364 | 46  | 0.75 | 0.0538                               | 0.0021 | 0.313                               | 0.025 | 0.0423                              | 0.0022 | 0.17 | 346                                  | 85  | 276                                 | 19  | 267                                 | 14  |
| <b>Wpg3-a11</b> | <b>TL1-4</b>   | 674                      | 526 | 105 | 0.78 | 0.1079                               | 0.0041 | 0.658                               | 0.053 | 0.044                               | 0.0023 | 0.48 | 1758                                 | 69  | 512                                 | 32  | 278                                 | 14  |
| <b>Wpg3-a12</b> | <b>SB11-7</b>  | 544                      | 655 | 129 | 1.2  | 0.1253                               | 0.0071 | 0.797                               | 0.076 | 0.0458                              | 0.0024 | 0.7  | 1980                                 | 110 | 589                                 | 44  | 289                                 | 15  |
| Wpg3-a13        |                | 426                      | 327 | 40  | 0.77 | 0.0528                               | 0.0021 | 0.309                               | 0.025 | 0.0421                              | 0.0022 | 0.05 | 318                                  | 87  | 273                                 | 19  | 266                                 | 14  |
| Wpg3-a14        |                | 557                      | 285 | 109 | 0.51 | 0.066                                | 0.0023 | 1.226                               | 0.097 | 0.1344                              | 0.007  | 0.33 | 807                                  | 73  | 812                                 | 44  | 813                                 | 40  |
| <b>Wpg3-a15</b> | <b>SB11-9</b>  | 607                      | 497 | 69  | 0.82 | 0.0672                               | 0.0026 | 0.38                                | 0.031 | 0.0413                              | 0.0021 | 0.09 | 844                                  | 80  | 328                                 | 23  | 261                                 | 13  |
| Wpg3-a16        |                | 413                      | 164 | 375 | 0.4  | 0.291                                | 0.013  | 4.59                                | 0.41  | 0.1131                              | 0.0061 | 0.89 | 3412                                 | 67  | 1729                                | 75  | 691                                 | 35  |
| Wpg3-a17        |                | 61                       | 22  | 132 | 0.36 | 0.424                                | 0.03   | 13.1                                | 1.5   | 0.232                               | 0.023  | 0.6  | 3900                                 | 110 | 2610                                | 110 | 1320                                | 110 |
| <b>Wpg3-a18</b> | <b>TL1-5</b>   | 552                      | 416 | 50  | 0.75 | 0.0538                               | 0.0021 | 0.305                               | 0.025 | 0.0411                              | 0.0021 | 0.07 | 350                                  | 83  | 270                                 | 19  | 259                                 | 13  |
| Wpg3-a19        |                | 377                      | 299 | 181 | 0.79 | 0.1366                               | 0.0071 | 2.46                                | 0.22  | 0.1287                              | 0.0067 | 0.13 | 2115                                 | 86  | 1232                                | 59  | 781                                 | 38  |
| Wpg3-a20        |                | 614                      | 287 | 36  | 0.47 | 0.0554                               | 0.0023 | 0.305                               | 0.025 | 0.0402                              | 0.0021 | 0.35 | 401                                  | 86  | 270                                 | 19  | 254                                 | 13  |
| Wpg3-a21        |                | 832                      | 675 | 189 | 0.81 | 0.1539                               | 0.007  | 1.13                                | 0.1   | 0.0534                              | 0.0035 | 1    | 2377                                 | 76  | 763                                 | 47  | 335                                 | 21  |
| Wpg3-a22        |                | 453                      | 256 | 114 | 0.57 | 0.0749                               | 0.0029 | 1.44                                | 0.12  | 0.1397                              | 0.0073 | 0.68 | 1076                                 | 75  | 904                                 | 49  | 843                                 | 41  |

|                 |               |      |      |     |      |        |        |       |       |        |        |      |      |     |      |     |      |     |
|-----------------|---------------|------|------|-----|------|--------|--------|-------|-------|--------|--------|------|------|-----|------|-----|------|-----|
| Wpg3-a23        |               | 493  | 34   | 22  | 0.07 | 0.0718 | 0.0027 | 1.59  | 0.13  | 0.1604 | 0.0083 | 0.3  | 983  | 77  | 964  | 49  | 959  | 46  |
| Wpg3-a24        |               | 513  | 566  | 85  | 1.1  | 0.1845 | 0.0092 | 0.748 | 0.071 | 0.0292 | 0.002  | 0.9  | 2671 | 83  | 553  | 38  | 184  | 12  |
| Wpg3-a25        |               | 135  | 92   | 368 | 0.68 | 0.1489 | 0.0063 | 13.9  | 1.6   | 0.665  | 0.061  | 0.95 | 2311 | 72  | 2630 | 110 | 3150 | 240 |
| Wpg3-a26        |               | 1027 | 921  | 132 | 0.9  | 0.0714 | 0.0028 | 0.436 | 0.036 | 0.0438 | 0.0023 | 0.99 | 969  | 75  | 367  | 25  | 276  | 14  |
| Wpg3-a27        |               | 245  | 141  | 24  | 0.58 | 0.0709 | 0.0039 | 0.422 | 0.038 | 0.0439 | 0.0023 | 0.2  | 880  | 110 | 357  | 27  | 277  | 14  |
| Wpg3-a28        |               | 250  | 160  | 24  | 0.64 | 0.0659 | 0.0043 | 0.408 | 0.042 | 0.044  | 0.0023 | 0.5  | 710  | 120 | 335  | 26  | 278  | 14  |
| <b>Wpg3-a29</b> | <b>TL1-2</b>  | 1161 | 1361 | 291 | 1.17 | 0.1576 | 0.0089 | 0.985 | 0.095 | 0.0462 | 0.0025 | 0.83 | 2419 | 94  | 694  | 48  | 291  | 15  |
| <b>Wpg3-a30</b> | <b>TL1-3</b>  | 217  | 124  | 37  | 0.57 | 0.1386 | 0.0075 | 0.892 | 0.082 | 0.047  | 0.0024 | 0.55 | 2180 | 110 | 645  | 46  | 296  | 15  |
| Wpg3-a31        |               | 769  | 654  | 111 | 0.85 | 0.1029 | 0.0045 | 0.602 | 0.052 | 0.0423 | 0.0022 | 0.68 | 1613 | 71  | 471  | 30  | 267  | 14  |
| Wpg3-a32        |               | 184  | 249  | 474 | 1.35 | 0.481  | 0.027  | 14.6  | 1.6   | 0.208  | 0.014  | 0.86 | 4115 | 97  | 2650 | 120 | 1204 | 74  |
| Wpg3-a33        |               | 803  | 762  | 155 | 0.95 | 0.1232 | 0.0053 | 0.733 | 0.076 | 0.0421 | 0.0034 | 0.95 | 1997 | 80  | 531  | 34  | 262  | 19  |
| Wpg3-a34        |               | 592  | 174  | 97  | 0.29 | 0.169  | 0.012  | 1.18  | 0.12  | 0.0489 | 0.0036 | 0.81 | 2340 | 140 | 747  | 58  | 307  | 21  |
| Wpg3-b1         |               | 74   | 50   | 51  | 0.68 | 0.4097 | 0.0092 | 3.67  | 0.18  | 0.0664 | 0.0039 | 0.78 | 3948 | 33  | 1557 | 38  | 414  | 24  |
| Wpg3-b2         |               | 84   | 53   | 19  | 0.63 | 0.1797 | 0.0041 | 1.118 | 0.048 | 0.0454 | 0.0025 | 0.17 | 2635 | 36  | 759  | 23  | 286  | 15  |
| <b>Wpg3-b3</b>  | <b>SB15-6</b> | 101  | 61   | 9   | 0.6  | 0.0755 | 0.003  | 0.407 | 0.022 | 0.0392 | 0.0022 | 0.24 | 1033 | 81  | 344  | 16  | 248  | 13  |
| Wpg3-b4         |               | 100  | 63   | 15  | 0.63 | 0.1341 | 0.0034 | 0.764 | 0.035 | 0.0412 | 0.0023 | 0.38 | 2138 | 45  | 575  | 20  | 260  | 14  |
| Wpg3-b5         |               | 61   | 34   | 37  | 0.56 | 0.361  | 0.018  | 3.53  | 0.4   | 0.065  | 0.0049 | 0.97 | 3658 | 74  | 1434 | 77  | 407  | 30  |
| Wpg3-b6         |               | 86   | 49   | 12  | 0.57 | 0.1223 | 0.0078 | 0.713 | 0.058 | 0.0424 | 0.0024 | 0.8  | 1860 | 110 | 527  | 33  | 268  | 15  |
| Wpg3-b7         |               | 112  | 79   | 14  | 0.71 | 0.1077 | 0.0048 | 0.547 | 0.036 | 0.037  | 0.0021 | 0.72 | 1733 | 84  | 436  | 22  | 234  | 13  |
| Wpg3-b8         |               | 85   | 45   | 131 | 0.53 | 0.5658 | 0.0083 | 8.65  | 0.37  | 0.1112 | 0.0062 | 0.63 | 4419 | 21  | 2299 | 39  | 680  | 36  |
| Wpg3-b9         |               | 85   | 66   | 8   | 0.78 | 0.0611 | 0.0025 | 0.34  | 0.019 | 0.041  | 0.0023 | 0.07 | 565  | 85  | 295  | 15  | 259  | 14  |
| Wpg3-b10        |               | 87   | 60   | 9   | 0.69 | 0.0754 | 0.0029 | 0.411 | 0.022 | 0.0398 | 0.0022 | 0.32 | 1047 | 77  | 346  | 15  | 252  | 14  |
| Wpg3-b11        |               | 79   | 39   | 6   | 0.49 | 0.0707 | 0.003  | 0.405 | 0.023 | 0.0426 | 0.0024 | 0.25 | 905  | 85  | 342  | 16  | 269  | 15  |
| Wpg3-b12        |               | 201  | 159  | 24  | 0.79 | 0.0834 | 0.0032 | 0.457 | 0.025 | 0.0402 | 0.0022 | 0.2  | 1236 | 77  | 380  | 17  | 254  | 14  |
| Wpg3-b13        |               | 77   | 53   | 8   | 0.69 | 0.0792 | 0.0033 | 0.442 | 0.025 | 0.0405 | 0.0023 | 0.26 | 1161 | 82  | 370  | 17  | 256  | 14  |
| <b>Wpg3-b14</b> | <b>SB15-1</b> | 56   | 49   | 7   | 0.88 | 0.0747 | 0.0029 | 0.415 | 0.022 | 0.0411 | 0.0023 | 0.04 | 1032 | 79  | 356  | 16  | 260  | 14  |

|                 |               |     |     |     |      |        |        |       |       |        |        |      |      |     |      |    |     |    |
|-----------------|---------------|-----|-----|-----|------|--------|--------|-------|-------|--------|--------|------|------|-----|------|----|-----|----|
| Wpg3-b15        |               | 79  | 48  | 53  | 0.61 | 0.4    | 0.024  | 3.58  | 0.46  | 0.0607 | 0.0052 | 0.97 | 3858 | 92  | 1464 | 98 | 378 | 32 |
| Wpg3-b16        |               | 101 | 54  | 23  | 0.53 | 0.1827 | 0.005  | 1.214 | 0.059 | 0.049  | 0.0027 | 0.39 | 2681 | 45  | 809  | 26 | 308 | 17 |
| Wpg3-b17        |               | 60  | 41  | 22  | 0.68 | 0.2484 | 0.0065 | 1.868 | 0.089 | 0.0542 | 0.0031 | 0.39 | 3172 | 41  | 1066 | 31 | 340 | 19 |
| Wpg3-b18        |               | 73  | 50  | 11  | 0.68 | 0.1281 | 0.0091 | 0.751 | 0.067 | 0.0427 | 0.0024 | 0.55 | 1690 | 140 | 550  | 39 | 270 | 15 |
| <b>Wpg3-b19</b> | <b>SB15-7</b> | 179 | 213 | 43  | 1.19 | 0.169  | 0.013  | 1.18  | 0.11  | 0.0466 | 0.0026 | 0.88 | 2110 | 160 | 720  | 52 | 294 | 16 |
| Wpg3-b20        |               | 61  | 34  | 7   | 0.56 | 0.0969 | 0.0062 | 0.576 | 0.044 | 0.043  | 0.0025 | 0.43 | 1440 | 130 | 453  | 28 | 271 | 15 |
| Wpg3-b21        |               | 159 | 101 | 21  | 0.64 | 0.1109 | 0.0028 | 0.623 | 0.03  | 0.0405 | 0.0022 | 0.22 | 1805 | 48  | 492  | 18 | 256 | 14 |
| Wpg3-b22        |               | 62  | 33  | 43  | 0.53 | 0.395  | 0.014  | 3.89  | 0.26  | 0.0686 | 0.0042 | 0.89 | 3861 | 55  | 1568 | 56 | 427 | 25 |
| Wpg3-b23        |               | 77  | 46  | 8   | 0.6  | 0.0799 | 0.0041 | 0.437 | 0.027 | 0.0401 | 0.0022 | 0.19 | 1065 | 99  | 360  | 18 | 253 | 14 |
| <b>Wpg3-b24</b> | <b>SB15-4</b> | 97  | 70  | 11  | 0.72 | 0.0754 | 0.0035 | 0.441 | 0.026 | 0.0421 | 0.0023 | 0.39 | 969  | 92  | 364  | 18 | 266 | 14 |
| Wpg3-b25        |               | 87  | 61  | 18  | 0.7  | 0.1776 | 0.0044 | 1.053 | 0.048 | 0.0436 | 0.0024 | 0.32 | 2619 | 41  | 728  | 24 | 275 | 15 |
| Wpg3-b26        |               | 70  | 42  | 14  | 0.6  | 0.1558 | 0.0073 | 1.032 | 0.07  | 0.0478 | 0.0027 | 0.73 | 2395 | 81  | 713  | 34 | 301 | 16 |
| Wpg3-b27        |               | 67  | 32  | 10  | 0.48 | 0.1372 | 0.0085 | 0.795 | 0.059 | 0.0423 | 0.0024 | 0.46 | 2130 | 100 | 579  | 31 | 267 | 15 |
| Wpg3-b28        |               | 69  | 45  | 18  | 0.65 | 0.19   | 0.015  | 1.32  | 0.14  | 0.0482 | 0.0029 | 0.9  | 2600 | 120 | 802  | 53 | 303 | 18 |
| Wpg3-b29        |               | 131 | 68  | 25  | 0.52 | 0.172  | 0.015  | 1.16  | 0.13  | 0.0438 | 0.0025 | 0.85 | 2080 | 150 | 696  | 56 | 276 | 16 |
| Wpg3-b30        |               | 60  | 33  | 10  | 0.55 | 0.145  | 0.0069 | 0.91  | 0.059 | 0.0442 | 0.0025 | 0.58 | 2271 | 83  | 637  | 30 | 279 | 15 |
| Wpg3-b31        |               | 84  | 48  | 7   | 0.57 | 0.0674 | 0.0026 | 0.383 | 0.02  | 0.0412 | 0.0023 | 0.09 | 824  | 81  | 327  | 15 | 260 | 14 |
| Wpg3-b32        |               | 99  | 54  | 13  | 0.55 | 0.0983 | 0.0074 | 0.577 | 0.051 | 0.0421 | 0.0023 | 0.57 | 1420 | 130 | 450  | 30 | 266 | 14 |
| Wpg3-b33        |               | 91  | 62  | 101 | 0.68 | 0.51   | 0.01   | 6.44  | 0.33  | 0.0902 | 0.0052 | 0.93 | 4258 | 31  | 2026 | 47 | 556 | 31 |
| Wpg3-b34        |               | 101 | 71  | 9   | 0.7  | 0.0667 | 0.0034 | 0.361 | 0.023 | 0.0391 | 0.0021 | 0.16 | 670  | 87  | 302  | 15 | 247 | 13 |
| Wpg3-b35        |               | 152 | 104 | 34  | 0.68 | 0.188  | 0.011  | 1.17  | 0.093 | 0.0446 | 0.0025 | 0.85 | 2619 | 95  | 769  | 42 | 282 | 16 |
| Wpg3-b36        |               | 88  | 63  | 8   | 0.72 | 0.0679 | 0.0034 | 0.376 | 0.024 | 0.0402 | 0.0022 | 0.4  | 687  | 85  | 313  | 15 | 254 | 14 |
| Wpg3-b37        |               | 84  | 58  | 12  | 0.69 | 0.1028 | 0.0049 | 0.619 | 0.037 | 0.0442 | 0.0024 | 0.41 | 1611 | 87  | 482  | 23 | 279 | 15 |
| Wpg3-b38        |               | 68  | 43  | 7   | 0.63 | 0.0814 | 0.0045 | 0.459 | 0.032 | 0.0415 | 0.0023 | 0.49 | 1090 | 100 | 375  | 20 | 262 | 14 |
| Wpg3-b39        |               | 80  | 54  | 7   | 0.68 | 0.061  | 0.0023 | 0.343 | 0.018 | 0.0404 | 0.0022 | 0.16 | 609  | 80  | 299  | 14 | 255 | 14 |
| Wpg3-b40        |               | 82  | 51  | 10  | 0.62 | 0.1019 | 0.0056 | 0.568 | 0.037 | 0.0406 | 0.0023 | 0.29 | 1550 | 100 | 447  | 23 | 257 | 14 |



|                 |               |     |     |     |      |        |        |       |       |        |        |      |      |     |      |     |     |    |
|-----------------|---------------|-----|-----|-----|------|--------|--------|-------|-------|--------|--------|------|------|-----|------|-----|-----|----|
| Wpg3-b41        |               | 51  | 33  | 103 | 0.65 | 0.619  | 0.012  | 11.3  | 0.5   | 0.1329 | 0.0077 | 0.45 | 4550 | 28  | 2549 | 40  | 804 | 44 |
| Wpg3-b42        |               | 69  | 49  | 31  | 0.71 | 0.264  | 0.019  | 2.3   | 0.23  | 0.0571 | 0.0035 | 0.91 | 3060 | 120 | 1119 | 72  | 357 | 21 |
| Wpg3-b43        |               | 65  | 37  | 6   | 0.57 | 0.0762 | 0.0038 | 0.434 | 0.028 | 0.0414 | 0.0023 | 0.45 | 952  | 94  | 351  | 17  | 261 | 14 |
| Wpg3-b44        |               | 86  | 49  | 40  | 0.57 | 0.3126 | 0.0062 | 2.7   | 0.12  | 0.0621 | 0.0034 | 0.31 | 3531 | 30  | 1328 | 32  | 388 | 21 |
| Wpg3-b45        |               | 89  | 62  | 11  | 0.7  | 0.0994 | 0.0034 | 0.559 | 0.027 | 0.0407 | 0.0023 | 0.07 | 1614 | 64  | 450  | 18  | 257 | 14 |
| Wpg3-b46        |               | 132 | 64  | 33  | 0.48 | 0.227  | 0.011  | 1.343 | 0.084 | 0.0438 | 0.0024 | 0.7  | 3020 | 77  | 842  | 36  | 276 | 15 |
| Wpg3-b47        |               | 49  | 33  | 80  | 0.67 | 0.55   | 0.012  | 8.74  | 0.4   | 0.1166 | 0.0071 | 0.48 | 4381 | 34  | 2312 | 39  | 713 | 40 |
| Wpg3-b48        |               | 194 | 155 | 69  | 0.8  | 0.235  | 0.02   | 1.89  | 0.2   | 0.0514 | 0.0031 | 0.95 | 2600 | 170 | 941  | 73  | 322 | 19 |
| <b>Wpg3-b49</b> | <b>SB15-5</b> | 102 | 67  | 22  | 0.66 | 0.1564 | 0.008  | 0.922 | 0.056 | 0.0427 | 0.0023 | 0.17 | 2304 | 83  | 645  | 28  | 269 | 14 |
| Wpg3-b50        |               | 124 | 90  | 16  | 0.73 | 0.0958 | 0.006  | 0.548 | 0.04  | 0.042  | 0.0023 | 0.43 | 1400 | 120 | 436  | 26  | 265 | 14 |
| Wpg3-b51        |               | 101 | 85  | 33  | 0.84 | 0.214  | 0.013  | 1.49  | 0.12  | 0.0506 | 0.0029 | 0.8  | 2855 | 92  | 910  | 46  | 318 | 18 |
| Wpg3-b52        |               | 68  | 51  | 14  | 0.75 | 0.1462 | 0.0087 | 0.95  | 0.07  | 0.0458 | 0.0025 | 0.63 | 2150 | 110 | 655  | 37  | 289 | 16 |
| Wpg3-b53        |               | 67  | 47  | 10  | 0.7  | 0.1221 | 0.0068 | 0.746 | 0.054 | 0.0446 | 0.0025 | 0.51 | 1950 | 100 | 558  | 30  | 281 | 16 |
| Wpg3-b54        |               | 267 | 262 | 136 | 0.98 | 0.2743 | 0.0043 | 2.42  | 0.1   | 0.0644 | 0.0036 | 0.29 | 3330 | 25  | 1250 | 30  | 402 | 22 |
| Wpg3-b55        |               | 92  | 57  | 43  | 0.62 | 0.3183 | 0.009  | 2.54  | 0.13  | 0.059  | 0.0033 | 0.77 | 3563 | 42  | 1283 | 39  | 370 | 20 |
| Wpg3-b56        |               | 114 | 83  | 16  | 0.73 | 0.1052 | 0.0089 | 0.639 | 0.063 | 0.0428 | 0.0024 | 0.7  | 1410 | 140 | 468  | 34  | 270 | 15 |
| Wpg3-b57        |               | 88  | 49  | 43  | 0.56 | 0.351  | 0.0061 | 2.81  | 0.12  | 0.058  | 0.0032 | 0.61 | 3708 | 26  | 1356 | 32  | 364 | 19 |
| Wpg3-b58        |               | 101 | 60  | 21  | 0.59 | 0.174  | 0.011  | 1.151 | 0.095 | 0.0463 | 0.0026 | 0.83 | 2480 | 120 | 749  | 46  | 292 | 16 |
| Wpg3-b59        |               | 89  | 54  | 81  | 0.61 | 0.373  | 0.027  | 4.8   | 0.57  | 0.0759 | 0.0059 | 0.98 | 3500 | 130 | 1510 | 110 | 469 | 35 |
| <b>Wpg3-b60</b> | <b>SB15-2</b> | 143 | 110 | 18  | 0.77 | 0.0822 | 0.0033 | 0.478 | 0.027 | 0.0422 | 0.0024 | 0.4  | 1255 | 79  | 394  | 18  | 266 | 14 |
| Wpg3-b61        |               | 71  | 42  | 18  | 0.59 | 0.2029 | 0.0086 | 1.208 | 0.067 | 0.0425 | 0.0023 | 0.24 | 2828 | 69  | 786  | 30  | 268 | 14 |
| Wpg3-b62        |               | 48  | 25  | 5   | 0.52 | 0.0933 | 0.0068 | 0.521 | 0.04  | 0.0411 | 0.0025 | 0.16 | 1370 | 140 | 421  | 27  | 260 | 15 |
| Wpg3-b63        |               | 63  | 46  | 98  | 0.73 | 0.5575 | 0.0091 | 8.75  | 0.37  | 0.1125 | 0.0062 | 0.79 | 4400 | 24  | 2307 | 40  | 687 | 36 |
| Wpg3-b64        |               | 129 | 83  | 18  | 0.64 | 0.1012 | 0.0063 | 0.509 | 0.039 | 0.0363 | 0.0021 | 0.46 | 1454 | 99  | 399  | 23  | 230 | 13 |
| Wpg3-b65        |               | 63  | 40  | 8   | 0.63 | 0.1061 | 0.005  | 0.605 | 0.038 | 0.0419 | 0.0024 | 0.4  | 1683 | 86  | 481  | 24  | 265 | 15 |
| Wpg3-b66        |               | 147 | 66  | 155 | 0.45 | 0.521  | 0.012  | 5.96  | 0.29  | 0.0826 | 0.0048 | 0.73 | 4308 | 35  | 1971 | 41  | 511 | 29 |

|          |     |    |    |      |        |        |       |       |        |        |      |      |    |      |    |     |    |
|----------|-----|----|----|------|--------|--------|-------|-------|--------|--------|------|------|----|------|----|-----|----|
| Wpg3-b67 | 91  | 67 | 16 | 0.74 | 0.1309 | 0.006  | 0.818 | 0.051 | 0.0444 | 0.0025 | 0.51 | 2081 | 80 | 593  | 27 | 280 | 15 |
| Wpg3-b68 | 72  | 53 | 9  | 0.74 | 0.0869 | 0.0031 | 0.498 | 0.026 | 0.0414 | 0.0024 | 0.08 | 1369 | 70 | 409  | 17 | 262 | 15 |
| Wpg3-b69 | 68  | 43 | 28 | 0.63 | 0.269  | 0.013  | 2.18  | 0.16  | 0.0573 | 0.0033 | 0.82 | 3234 | 80 | 1139 | 51 | 359 | 20 |
| Wpg3-b70 | 100 | 67 | 8  | 0.67 | 0.0534 | 0.0018 | 0.298 | 0.015 | 0.0406 | 0.0023 | 0.04 | 322  | 69 | 263  | 12 | 256 | 14 |

Table DR2: U-Pb isotopic data of CA- ID-IRMS analyzed single zircon grains.

| Sample        | Analysis ID        | Compositional Parameters |                 |                |                         | Radiogenic Isotope Ratios |                         |               |                         |               |                         |                | Isotopic Ages   |                         |                 |                         |               |                         |                |
|---------------|--------------------|--------------------------|-----------------|----------------|-------------------------|---------------------------|-------------------------|---------------|-------------------------|---------------|-------------------------|----------------|-----------------|-------------------------|-----------------|-------------------------|---------------|-------------------------|----------------|
|               |                    | <u>Th</u>                | <u>Pb*</u>      | Pbc            | <u><sup>206</sup>Pb</u> | <u><sup>208</sup>Pb</u>   | <u><sup>207</sup>Pb</u> | % err         | <u><sup>207</sup>Pb</u> | % err         | <u><sup>206</sup>Pb</u> | % err          | corr.           | <u><sup>207</sup>Pb</u> | ±               | <u><sup>207</sup>Pb</u> | ±             | <u><sup>206</sup>Pb</u> | ±              |
|               |                    | U                        | Pb <sub>c</sub> | (pg)           | <sup>204</sup> Pb       | <sup>206</sup> Pb         | <sup>206</sup> Pb       | (e)           | <sup>235</sup> U        | (e)           | <sup>238</sup> U        | (e)            | coef.           | <sup>206</sup> Pb       | (e)             | <sup>235</sup> U        | (e)           | <sup>238</sup> U        | (e)            |
| <b>Scg0-2</b> | YZ03-6             | 0.53                     | 3.1             | 1.4            | 206.6                   | 0.1676                    | 0.0514                  | 2.9           | 0.2896                  | 3.2           | 0.04085                 | 0.26           | 0.92            | 260                     | 67              | 258.2                   | 7.2           | 258.08                  | 0.66           |
|               | YZ03-7             | 0.63                     | 3.8             | 2.3            | 242.1                   | 0.1955                    | 0.0501                  | 2.9           | 0.2809                  | 3.1           | 0.04069                 | 0.25           | 0.83            | 198                     | 67              | 251.3                   | 6.9           | 257.08                  | 0.63           |
|               | YZ03-8             | 0.52                     | 1.2             | 2.5            | 94.4                    | 0.1607                    | 0.0500                  | 6.6           | 0.281                   | 7.1           | 0.04066                 | 0.57           | 0.89            | 196                     | 153             | 251                     | 16            | 256.9                   | 1.4            |
|               | YZ03-9             | 1.1                      | 4.1             | 4.1            | 233.7                   | 0.3516                    | 0.0515                  | 2.2           | 0.2891                  | 2.4           | 0.040737                | 0.22           | 0.83            | 262                     | 51              | 257.9                   | 5.4           | 257.4                   | 0.55           |
|               | YZ03-10            | 0.52                     | 1.7             | 2.2            | 123                     | 0.1622                    | 0.0501                  | 5.3           | 0.281                   | 5.7           | 0.04068                 | 0.50           | 0.79            | 197                     | 123             | 251                     | 13            | 257.0                   | 1.3            |
| <b>Scg2-3</b> | YZ03-11            | 0.68                     | 1.4             | 2.5            | 99.4                    | 0.2131                    | 0.0505                  | 7.3           | 0.283                   | 7.8           | 0.04056                 | 0.62           | 0.77            | 219                     | 170             | 253                     | 17            | 256.3                   | 1.6            |
|               | YZ03-12            | 0.70                     | 3.00            | 3.7            | 190.7                   | 0.2357                    | 0.0547                  | 3.1           | 0.307                   | 3.3           | 0.04076                 | 0.30           | 0.83            | 397                     | 69              | 271.9                   | 7.9           | 257.56                  | 0.75           |
|               | <del>YZ03-13</del> | <del>0.80</del>          | <del>0.20</del> | <del>8.1</del> | <del>28.2</del>         | <del>0.2148</del>         | <del>0.043</del>        | <del>43</del> | <del>0.24</del>         | <del>45</del> | <del>0.0411</del>       | <del>2.9</del> | <del>0.73</del> | <del>199</del>          | <del>1069</del> | <del>219</del>          | <del>88</del> | <del>259.9</del>        | <del>7.4</del> |
|               | YZ03-14            | 0.74                     | 1.6             | 2.5            | 108.7                   | 0.2322                    | 0.0505                  | 6.3           | 0.283                   | 6.8           | 0.04069                 | 0.53           | 0.84            | 219                     | 146             | 253                     | 15            | 257.1                   | 1.4            |
|               | YZ03-15            | 0.74                     | 1.5             | 2.7            | 106.2                   | 0.2338                    | 0.0510                  | 5.4           | 0.286                   | 5.9           | 0.04069                 | 0.49           | 0.9             | 242                     | 125             | 256                     | 13            | 257.1                   | 1.2            |
| <b>Wpg3</b>   | TL1-1              | 0.72                     | 26              | 0.26           | 1541                    | 0.2273                    | 0.05165                 | 1.2           | 0.2939                  | 1.3           | 0.0412917               | 0.11           | 0.89            | 269                     | 26              | 261.6                   | 2.9           | 260.83                  | 0.29           |
|               | TL1-2              | 0.85                     | 40              | 0.32           | 2275                    | 0.2674                    | 0.05135                 | 0.65          | 0.2913                  | 0.71          | 0.0411676               | 0.065          | 0.87            | 256                     | 15              | 259.6                   | 1.6           | 260.07                  | 0.16           |
|               | TL1-3              | 0.64                     | 9.0             | 0.31           | 553                     | 0.2006                    | 0.0512                  | 2.8           | 0.2910                  | 3.0           | 0.04127                 | 0.25           | 0.94            | 247                     | 64              | 259.3                   | 6.9           | 260.70                  | 0.64           |
|               | TL1-4              | 0.76                     | 11              | 0.33           | 660                     | 0.2391                    | 0.0511                  | 2.2           | 0.2909                  | 2.4           | 0.041301                | 0.20           | 0.94            | 245                     | 50              | 259.3                   | 5.4           | 260.89                  | 0.51           |

|         |      |     |      |      |        |         |      |         |      |          |      |      |     |     |        |      |         |       |
|---------|------|-----|------|------|--------|---------|------|---------|------|----------|------|------|-----|-----|--------|------|---------|-------|
| TL1-5   | 0.74 | 78  | 0.44 | 4512 | 0.2350 | 0.05146 | 0.25 | 0.29247 | 0.27 | 0.041242 | 0.03 | 0.71 | 260 | 6   | 260.50 | 0.62 | 260.527 | 0.083 |
| SB11-7  | 0.56 | 3.3 | 1.4  | 214  | 0.1787 | 0.0517  | 2.5  | 0.2920  | 2.7  | 0.041013 | 0.22 | 0.94 | 269 | 57  | 260.1  | 6.2  | 259.11  | 0.55  |
| SB11-9  | 0.76 | 1.2 | 1.1  | 86   | 0.2377 | 0.0509  | 11   | 0.287   | 11   | 0.04092  | 0.75 | 0.77 | 235 | 251 | 256    | 26   | 258.5   | 1.9   |
| SB11-10 | 0.75 | 6.7 | 0.67 | 403  | 0.2350 | 0.0510  | 2.2  | 0.2899  | 2.4  | 0.041229 | 0.19 | 0.92 | 241 | 51  | 258.5  | 5.5  | 260.44  | 0.50  |
| SB15-1  | 0.61 | 2.9 | 0.70 | 190  | 0.1889 | 0.0506  | 4.5  | 0.288   | 4.8  | 0.04126  | 0.36 | 0.96 | 220 | 104 | 257    | 11   | 260.64  | 0.93  |
| SB15-2  | 0.71 | 11  | 0.35 | 633  | 0.2254 | 0.0514  | 2.1  | 0.2918  | 2.3  | 0.041215 | 0.19 | 0.96 | 257 | 49  | 260.0  | 5.3  | 260.36  | 0.48  |
| SB15-4  | 0.58 | 11  | 0.20 | 665  | 0.1839 | 0.0514  | 3.5  | 0.292   | 3.8  | 0.04123  | 0.32 | 0.97 | 258 | 81  | 260.2  | 8.7  | 260.46  | 0.80  |
| SB15-5  | 0.72 | 2.9 | 0.46 | 188  | 0.2255 | 0.0505  | 6.3  | 0.287   | 6.8  | 0.04116  | 0.52 | 0.97 | 218 | 145 | 256    | 15   | 260.0   | 1.3   |
| SB15-6  | 0.74 | 4.4 | 0.39 | 274  | 0.2310 | 0.0507  | 4.9  | 0.286   | 5.3  | 0.04096  | 0.42 | 0.94 | 227 | 113 | 256    | 12   | 258.8   | 1.1   |
| SB15-7  | 0.77 | 5.2 | 0.68 | 317  | 0.2417 | 0.0508  | 2.8  | 0.2882  | 3.0  | 0.041198 | 0.23 | 0.93 | 229 | 64  | 257.1  | 6.8  | 260.25  | 0.58  |

- (a) Model Th/U ratio calculated from radiogenic  $^{208}\text{Pb}/^{206}\text{Pb}$  ratio and  $^{207}\text{Pb}/^{235}\text{U}$  age.
- (b)  $\text{Pb}^*$  and  $\text{Pb}_c$  represent radiogenic and common Pb, respectively.
- (c) Measured ratio corrected for spike and fractionation only.
- (d) Corrected for fractionation, spike, and common Pb; all common Pb was assumed to be blank with the isotopic composition of  $^{206}\text{Pb}/^{204}\text{Pb} = 18.59 \pm 0.65\%$ ;  $^{207}\text{Pb}/^{204}\text{Pb} = 15.79 \pm 0.70\%$ ;  $^{208}\text{Pb}/^{204}\text{Pb} = 38.54 \pm 0.65\%$  ( $1\sigma$ ).
- (e) Errors are 2-sigma, propagated using the algorithms of Schmitz and Schoene (2007) and Crowley et al. (2007).
- (f) Calculations are based on the decay constants of Jaffey et al. (1971) and a  $^{238}\text{U}/^{235}\text{U}$  ratio of 137.818 (Hiess et al., 2012).
- Analysis YZ03-13 is rejected from further consideration due to  $\text{Pb}^*/\text{Pb}_c$  below 1.

## References

- Crowley, J.L., Schoene, B., and Bowring, S.A., 2007, U-Pb dating of zircon in the Bishop Tuff at the millennial scale: *Geology*, v. 35, p. 1123–1126.
- Hiess, J., Condon, D. J., McLean, N., and Noble, S. R., 2012,  $^{238}\text{U}/^{235}\text{U}$  Systematics in Terrestrial Uranium-Bearing Minerals: *Science*, v. 335, p. 1610–1614.
- Huang, H., Cawood, P.A., Hou, M.C., Xiong, F.H., Ni, S.J., Deng, M., Zhong, H.T., and Yang, C.C., 2022, Zircon U-Pb age, trace element, and Hf isotopic constrains on the origin and evolution of the Emeishan Large Igneous Province: *Gondwana Research*, v. 105, p. 535–550.
- Huyskens, M.H., Iizuka, T., and Amelin, Y., 2012, Evaluation of colloidal silicagels for lead isotopic measurements using thermal ionisation mass spectrometry: *Journal of*

- Analytical Atomic Spectrometry, v. 27, p. 1439–1446.
- Huyskens, M.H., Zink, S., and Amelin, Y., 2016. Evaluation of temperature-time conditions for the chemical abrasion treatment of single zircons for U-Pb geochronology: *Chemical Geology*, v. 438, p. 25–35.
- Jaffey, A. H., Flynn, K. F., Glendenin, Le, Bentley, W. C., and Essling, A. M., 1971, Precision Measurement of Half-Lives and Specific Activities of  $^{235}\text{U}$  and  $^{238}\text{U}$ : *Physical Review C*, v. 4, p. 1889–1906.
- Krogh, T., 1973, A low-contamination method for hydrothermal decomposition of zircon and extraction of U and Pb for isotopic age determinations: *Geochimica et Cosmochimica Acta*, v. 37, p. 485–494.
- Schaltegger, U., Ovtcharova, M., Gaynor, S.P., Schoene, B., Wotzlaw, J., Davies, J.H., Farina, F., Greber, N., Szymanowski, D., and Chelle-Michou, C., 2021, Long-term repeatability and interlaboratory reproducibility of high-precision ID-TIMS U-Pb geochronology: *Journal of Analytical Atomic Spectrometry*, v. 36, p. 1466–1477.
- Schmitz, M. D., and Schoene, B., 2007, Derivation of isotope ratios, errors, and error correlations for U-Pb geochronology using  $^{205}\text{Pb}$ - $^{235}\text{U}$ -( $^{233}\text{U}$ )-spiked isotope dilution thermal ionization mass spectrometric data: *Geochemistry Geophysics Geosystems*, v. 8, Q08006.
- Verbruggen, A., Alonso, A., Eykens, R., Kehoe, F., Kuhn, H., Richter, S., and Aregbe, Y., 2008, Preparation and certification of IRMM-3636, IRMM-3636a and IRMM-3636b: OPOCE, 24pp.
- Vermeesch, P., 2018, IsoplotR: A free and open toolbox for geochronology: *Geoscience Frontiers*, v. 9, p. 1479–1493.
- Villa, I.M., Bonardi, M.L., De Bièvre, P., Holden, N.E., and Renne, P.R., 2016, IUPAC-IUGS status report on the half-lives of  $^{238}\text{U}$ ,  $^{235}\text{U}$  and  $^{234}\text{U}$ : *Geochimica et Cosmochimica Acta*, v. 172, p. 387–392.
